# Supplementary material for: First genetically confirmed records of the little gulper shark Centrophorusuyato (Squaliformes: Centrophoridae) from Cypriot waters
Source: Biodivers Data J. 2021 Sep 16;9:e71837. doi: 10.3897/BDJ.9.e71837 (PMC8460593; doi:10.3897/BDJ.9.e71837)
Supplement: Supplementary material 1 — Number (N) of studies reporting gulper sharks in the Mediterranean Sea [file bdj-09-e71837-s001.xlsx]

## Sheet: Suppl. material 1
Suppl. material 1. Number (N) of studies reporting gulper sharks in the Mediterranean Sea. The scientific name/s reported in each study are provided.
N	Species name reported in each reference	Country	Location	LAT (dd)		LONG (dd)		Reference
1	Centrophorus uyato	Spain	Northern Alboran Sea	36.483	N	-2.88	W	Norén M, Shah M (2017) Fishbase. FishBase. Occurrence dataset https://doi.org/10.15468/wk3zk7 accessed via GBIF.org on 2020-09-18. accessed via GBIF.org on 2021-01-23. https://www.gbif.org/occurrence/864459185
2	Centrophorus uyato	Spain	Northern Alboran Sea	36.483	N	-2.88	W	Guerrero E, Abelló P, Lombarte A, Villanueva R, Ramón M, Sabatés A, Santos R (2020) Biological Reference Collections ICM-CSIC. Version 1.28. Institute of Marine Sciences (ICM-CSIC). Occurrence dataset https://doi.org/10.15470/qlqqdx accessed via GBIF.org on 2021-01-23. https://www.gbif.org/occurrence/1313787653
3	Centrophorus uyato	Spain	Northern Alboran Sea	36	N	-3.04	W	Guerrero E, Abelló P, Lombarte A, Villanueva R, Ramón M, Sabatés A, Santos R (2020) Biological Reference Collections ICM-CSIC. Version 1.28. Institute of Marine Sciences (ICM-CSIC). Occurrence dataset https://doi.org/10.15470/qlqqdx accessed via GBIF.org on 2021-01-23. https://www.gbif.org/occurrence/1313787661
4	Centrophorus uyato	Spain	Northern Alboran Sea	36	N	-3.05	W	Norén M, Shah M (2017) Fishbase. FishBase. Occurrence dataset https://doi.org/10.15468/wk3zk7 accessed via GBIF.org on 2020-09-18. accessed via GBIF.org on 2021-01-23. https://www.gbif.org/occurrence/864459606
5	Centrophorus cf. granulosus	Spain	Northern Alboran Sea	36.6717	N	-4.38148	W	Follesa MC, Marongiu MF, Zupa W, Bellodi A, Cau A, Cannas R, Colloca F, Djurovic M, Isajlovic I, Jadaud A, Manfredi C, Mulas A, Peristeraki P, Porcu C, Ramirez-Amaro S, Jiménez FS, Serena F, Sion L, Thasitis I, Cau A, Carbonara P (2019) Spatial variability of Chondrichthyes in the northern Mediterranean. Scientia Marina 83: 81-100.
6	Centrophorus uyato	Spain	Northern Alboran Sea	36.6717	N	-4.38148	W	Follesa MC, Marongiu MF, Zupa W, Bellodi A, Cau A, Cannas R, Colloca F, Djurovic M, Isajlovic I, Jadaud A, Manfredi C, Mulas A, Peristeraki P, Porcu C, Ramirez-Amaro S, Jiménez FS, Serena F, Sion L, Thasitis I, Cau A, Carbonara P (2019) Spatial variability of Chondrichthyes in the northern Mediterranean. Scientia Marina 83: 81-100.
7	Centrophorus uyato	Spain	Northern Alboran Sea	36.6717	N	-4.38148	W	García-Ruiz C, Lloris D, Rueda JL, García-Martínez MC, Gil de Sola L (2015) Spatial distribution of ichthyofauna in the northern Alboran Sea (western Mediterranean), Journal of Natural History 49: 19-20, 1191-1224. https://doi.org/10.1080/00222933.2014.1001457
8	Centrophorus uyato	Spain	Northern Alboran Sea	36.6717	N	-4.38148	W	Bertrand J, Gil de Sola L, Papakonstantinou C, Relini G, Souplet A (2000) Contribution on the distribution of elasmobranchs in the Mediterranean (from the Medits Surveys). Biologia Marina Mediterranea 7 (1): 385-399.
9	Centrophorus granulosus	Spain	Balearic Sea	39.49	N	0.15	E	Ranz J (2017) Banco de Datos de la Biodiversidad de la Comunitat Valenciana. Biodiversity data bank of Generalitat Valenciana. Occurrence dataset https://doi.org/10.15468/b4yqdy accessed via GBIF.org on 2021-06-17. https://www.gbif.org/occurrence/1500758223
10	Centrophorus granulosus	Spain	Balearic Sea	39.4	N	0.15	E	Ranz J (2017) Banco de Datos de la Biodiversidad de la Comunitat Valenciana. Biodiversity data bank of Generalitat Valenciana. Occurrence dataset https://doi.org/10.15468/b4yqdy accessed via GBIF.org on 2021-06-17. https://www.gbif.org/occurrence/1500758221
11	Centrophorus granulosus	Spain	Balearic Sea	39.4	N	0.04	E	Ranz J (2017) Banco de Datos de la Biodiversidad de la Comunitat Valenciana. Biodiversity data bank of Generalitat Valenciana. Occurrence dataset https://doi.org/10.15468/b4yqdy accessed via GBIF.org on 2021-06-17. https://www.gbif.org/occurrence/1500758210
12	Centrophorus granulosus	Spain	Balearic Sea	39.31	N	0.04	E	Ranz J (2017) Banco de Datos de la Biodiversidad de la Comunitat Valenciana. Biodiversity data bank of Generalitat Valenciana. Occurrence dataset https://doi.org/10.15468/b4yqdy accessed via GBIF.org on 2021-06-17. https://www.gbif.org/occurrence/1500758201
13	Centrophorus granulosus	Spain	Balearic Sea	39.49	N	0.03	E	Ranz J (2017) Banco de Datos de la Biodiversidad de la Comunitat Valenciana. Biodiversity data bank of Generalitat Valenciana. Occurrence dataset https://doi.org/10.15468/b4yqdy accessed via GBIF.org on 2021-06-17. https://www.gbif.org/occurrence/1500758188
14	Centrophorus granulosus	Spain	Balearic Sea	39.49	N	0.03	E	Ranz J (2017) Banco de Datos de la Biodiversidad de la Comunitat Valenciana. Biodiversity data bank of Generalitat Valenciana. Occurrence dataset https://doi.org/10.15468/b4yqdy accessed via GBIF.org on 2021-06-17. https://www.gbif.org/occurrence/1500758196
15	Centrophorus granulosus	Spain	Balearic Sea	39.4	N	0.04	E	Ranz J (2017) Banco de Datos de la Biodiversidad de la Comunitat Valenciana. Biodiversity data bank of Generalitat Valenciana. Occurrence dataset https://doi.org/10.15468/b4yqdy accessed via GBIF.org on 2021-06-17. https://www.gbif.org/occurrence/1500758209
16	Centrophorus granulosus	Spain	Balearic Sea	39.31	N	0.04	E	Ranz J (2017) Banco de Datos de la Biodiversidad de la Comunitat Valenciana. Biodiversity data bank of Generalitat Valenciana. Occurrence dataset https://doi.org/10.15468/b4yqdy accessed via GBIF.org on 2021-06-17. https://www.gbif.org/occurrence/1500758242
17	Centrophorus granulosus	Spain	Balearic Sea	39.22	N	0.05	E	Ranz J (2017) Banco de Datos de la Biodiversidad de la Comunitat Valenciana. Biodiversity data bank of Generalitat Valenciana. Occurrence dataset https://doi.org/10.15468/b4yqdy accessed via GBIF.org on 2021-06-17. https://www.gbif.org/occurrence/1500758155
18	Centrophorus granulosus	Spain	Balearic Sea	39.58	N	0.15	E	Ranz J (2017) Banco de Datos de la Biodiversidad de la Comunitat Valenciana. Biodiversity data bank of Generalitat Valenciana. Occurrence dataset https://doi.org/10.15468/b4yqdy accessed via GBIF.org on 2021-06-17. https://www.gbif.org/occurrence/1500758183
19	Centrophorus granulosus	Spain	Balearic Sea	39.49	N	0.15	E	Ranz J (2017) Banco de Datos de la Biodiversidad de la Comunitat Valenciana. Biodiversity data bank of Generalitat Valenciana. Occurrence dataset https://doi.org/10.15468/b4yqdy accessed via GBIF.org on 2021-06-17. https://www.gbif.org/occurrence/1500758220
20	Centrophorus granulosus	Spain	Balearic Sea	39.4	N	0.15	E	Ranz J (2017) Banco de Datos de la Biodiversidad de la Comunitat Valenciana. Biodiversity data bank of Generalitat Valenciana. Occurrence dataset https://doi.org/10.15468/b4yqdy accessed via GBIF.org on 2021-06-17. https://www.gbif.org/occurrence/1500758248
21	Centrophorus granulosus	Spain	Balearic Sea	39.31	N	0.16	E	Ranz J (2017) Banco de Datos de la Biodiversidad de la Comunitat Valenciana. Biodiversity data bank of Generalitat Valenciana. Occurrence dataset https://doi.org/10.15468/b4yqdy accessed via GBIF.org on 2021-06-17. https://www.gbif.org/occurrence/1500758212
22	Centrophorus granulosus	Spain	Balearic Sea	39.22	N	0.16	E	Ranz J (2017) Banco de Datos de la Biodiversidad de la Comunitat Valenciana. Biodiversity data bank of Generalitat Valenciana. Occurrence dataset https://doi.org/10.15468/b4yqdy accessed via GBIF.org on 2021-06-17. https://www.gbif.org/occurrence/1500758236
23	Centrophorus uyato	Spain	Balearic Sea	39.5	N	0.2	E	Ranz J (2017) Banco de Datos de la Biodiversidad de la Comunitat Valenciana. Biodiversity data bank of Generalitat Valenciana. Occurrence dataset https://doi.org/10.15468/b4yqdy accessed via GBIF.org on 2021-01-23.
24	Centrophorus granulosus	Spain	Balearic Sea	39.86	N	0.37	E	Ranz J (2017) Banco de Datos de la Biodiversidad de la Comunitat Valenciana. Biodiversity data bank of Generalitat Valenciana. Occurrence dataset https://doi.org/10.15468/b4yqdy accessed via GBIF.org on 2021-06-17. https://www.gbif.org/occurrence/1500764033
25	Centrophorus granulosus	Spain	Balearic Sea	39.86	N	0.37	E	Ranz J (2017) Banco de Datos de la Biodiversidad de la Comunitat Valenciana. Biodiversity data bank of Generalitat Valenciana. Occurrence dataset https://doi.org/10.15468/b4yqdy accessed via GBIF.org on 2021-06-17. https://www.gbif.org/occurrence/1500764012
26	Centrophorus granulosus	Spain	Balearic Sea	39.77	N	0.37	E	Ranz J (2017) Banco de Datos de la Biodiversidad de la Comunitat Valenciana. Biodiversity data bank of Generalitat Valenciana. Occurrence dataset https://doi.org/10.15468/b4yqdy accessed via GBIF.org on 2021-06-17. https://www.gbif.org/occurrence/1500763996
27	Centrophorus granulosus	Spain	Balearic Sea	39.77	N	0.37	E	Ranz J (2017) Banco de Datos de la Biodiversidad de la Comunitat Valenciana. Biodiversity data bank of Generalitat Valenciana. Occurrence dataset https://doi.org/10.15468/b4yqdy accessed via GBIF.org on 2021-06-17. https://www.gbif.org/occurrence/1500763987
28	Centrophorus granulosus	Spain	Balearic Sea	40.04	N	0.48	E	Ranz J (2017) Banco de Datos de la Biodiversidad de la Comunitat Valenciana. Biodiversity data bank of Generalitat Valenciana. Occurrence dataset https://doi.org/10.15468/b4yqdy accessed via GBIF.org on 2021-06-17. https://www.gbif.org/occurrence/1500764181
29	Centrophorus granulosus	Spain	Balearic Sea	40.04	N	0.48	E	Ranz J (2017) Banco de Datos de la Biodiversidad de la Comunitat Valenciana. Biodiversity data bank of Generalitat Valenciana. Occurrence dataset https://doi.org/10.15468/b4yqdy accessed via GBIF.org on 2021-06-17. https://www.gbif.org/occurrence/1500764172
30	Centrophorus granulosus	Spain	Balearic Sea	39.95	N	0.48	E	Ranz J (2017) Banco de Datos de la Biodiversidad de la Comunitat Valenciana. Biodiversity data bank of Generalitat Valenciana. Occurrence dataset https://doi.org/10.15468/b4yqdy accessed via GBIF.org on 2021-06-17. https://www.gbif.org/occurrence/1500764187
31	Centrophorus granulosus	Spain	Balearic Sea	39.95	N	0.48	E	Ranz J (2017) Banco de Datos de la Biodiversidad de la Comunitat Valenciana. Biodiversity data bank of Generalitat Valenciana. Occurrence dataset https://doi.org/10.15468/b4yqdy accessed via GBIF.org on 2021-06-17. https://www.gbif.org/occurrence/1500764161
32	Centrophorus granulosus	Spain	Balearic Sea	39.86	N	0.49	E	Ranz J (2017) Banco de Datos de la Biodiversidad de la Comunitat Valenciana. Biodiversity data bank of Generalitat Valenciana. Occurrence dataset https://doi.org/10.15468/b4yqdy accessed via GBIF.org on 2021-06-17. https://www.gbif.org/occurrence/1500764149
33	Centrophorus granulosus	Spain	Balearic Sea	39.86	N	0.49	E	Ranz J (2017) Banco de Datos de la Biodiversidad de la Comunitat Valenciana. Biodiversity data bank of Generalitat Valenciana. Occurrence dataset https://doi.org/10.15468/b4yqdy accessed via GBIF.org on 2021-06-17. https://www.gbif.org/occurrence/1500764063
34	Centrophorus granulosus	Spain	Balearic Sea	39.77	N	0.49	E	Ranz J (2017) Banco de Datos de la Biodiversidad de la Comunitat Valenciana. Biodiversity data bank of Generalitat Valenciana. Occurrence dataset https://doi.org/10.15468/b4yqdy accessed via GBIF.org on 2021-06-17. https://www.gbif.org/occurrence/1500764077
35	Centrophorus granulosus	Spain	Balearic Sea	39.77	N	0.49	E	Ranz J (2017) Banco de Datos de la Biodiversidad de la Comunitat Valenciana. Biodiversity data bank of Generalitat Valenciana. Occurrence dataset https://doi.org/10.15468/b4yqdy accessed via GBIF.org on 2021-06-17. https://www.gbif.org/occurrence/1500764058
36	Centrophorus granulosus	Spain	Balearic Sea	40.04	N	0.6	E	Ranz J (2017) Banco de Datos de la Biodiversidad de la Comunitat Valenciana. Biodiversity data bank of Generalitat Valenciana. Occurrence dataset https://doi.org/10.15468/b4yqdy accessed via GBIF.org on 2021-06-17. https://www.gbif.org/occurrence/1500764241
37	Centrophorus granulosus	Spain	Balearic Sea	40.04	N	0.6	E	Ranz J (2017) Banco de Datos de la Biodiversidad de la Comunitat Valenciana. Biodiversity data bank of Generalitat Valenciana. Occurrence dataset https://doi.org/10.15468/b4yqdy accessed via GBIF.org on 2021-06-17. https://www.gbif.org/occurrence/1500764206
38	Centrophorus granulosus	Spain	Balearic Sea	39.95	N	0.6	E	Ranz J (2017) Banco de Datos de la Biodiversidad de la Comunitat Valenciana. Biodiversity data bank of Generalitat Valenciana. Occurrence dataset https://doi.org/10.15468/b4yqdy accessed via GBIF.org on 2021-06-17. https://www.gbif.org/occurrence/1500764233
39	Centrophorus granulosus	Spain	Balearic Sea	39.95	N	0.6	E	Ranz J (2017) Banco de Datos de la Biodiversidad de la Comunitat Valenciana. Biodiversity data bank of Generalitat Valenciana. Occurrence dataset https://doi.org/10.15468/b4yqdy accessed via GBIF.org on 2021-06-17. https://www.gbif.org/occurrence/1500764102
40	Centrophorus granulosus	Spain	Balearic Sea	39.86	N	0.6	E	Ranz J (2017) Banco de Datos de la Biodiversidad de la Comunitat Valenciana. Biodiversity data bank of Generalitat Valenciana. Occurrence dataset https://doi.org/10.15468/b4yqdy accessed via GBIF.org on 2021-06-17. https://www.gbif.org/occurrence/1500764216
41	Centrophorus granulosus	Spain	Balearic Sea	39.86	N	0.6	E	Ranz J (2017) Banco de Datos de la Biodiversidad de la Comunitat Valenciana. Biodiversity data bank of Generalitat Valenciana. Occurrence dataset https://doi.org/10.15468/b4yqdy accessed via GBIF.org on 2021-06-17. https://www.gbif.org/occurrence/1500764069
42	Centrophorus granulosus	Spain	Balearic Sea	40.4423	N	1.2115	E	Guallart J (1998) Contribución al conocimientto de la taxonomía y la biología del tiburón batial Centrophorus granulosus (Bloch & Schneider, 1801) (Elasmobranchii, Squalidae) en el Mar Balear (Mediterráneo occidental). Ph.D Thesis, Universitat de Valencia, Valencia: 291pp.
43	Centrophorus granulosus	Spain	Balearic Sea	40.4423	N	1.2115	E	Meléndez MJ, Báez JC, Serna-Quintero JM, Camiñas JA, Fernández IdL, Real R, Macías D (2017) Historical and ecological drivers of the spatial pattern of Chondrichthyes species richness in the Mediterranean Sea. PLoS ONE 12 (4): e0175699. https://doi.org/10.1371/journal.pone.0175728
44	Centrophorus granulosus	Spain	Balearic Sea	40.4423	N	1.2115	E	Lloris D, Rucabado J, Del Cerro LL, Portas F, Demestre M, Roig A (1984) Tots el peixos del Mar Catalfi. I: Llistat de cites i refer6ncies. Treballs de la Societat Catalanad'Ictiologia i Herpetologia 1: 1-208.
45	Centrophorus uyato	Spain	Balearic Sea	40.4423	N	1.2115	E	Meléndez MJ, Báez JC, Serna-Quintero JM, Camiñas JA, Fernández IdL, Real R, Macías D (2017) Historical and ecological drivers of the spatial pattern of Chondrichthyes species richness in the Mediterranean Sea. PLoS ONE 12 (4): e0175699. https://doi.org/10.1371/journal.pone.0175729
46	Centrophorus uyato	Spain	Balearic Sea	40.4423	N	1.2115	E	Lloris D, Rucabado J, Del Cerro LL, Portas F, Demestre M, Roig A (1984) Tots el peixos del Mar Catalfi. I: Llistat de cites i refer6ncies. Treballs de la Societat Catalanad'Ictiologia i Herpetologia 1: 1-208.
47	Centrophorus uyato	Spain	Balearic Sea	40.4423	N	1.2115	E	Navarro J, Coll M, Cardador L, Fernández AM, Bellido JM (2015) The relative roles of the environment, human activities and spatial factors in the spatial distribution of marine biodiversity in the Western Mediterranean Sea. Progress in Oceanography 131: 126-137.
48	Centrophorus granulosus	Spain	Balearic Sea	41.3866	N	2.611	E	Norén M, Shah M (2017) Fishbase. FishBase. Occurrence dataset https://doi.org/10.15468/wk3zk7 accessed via GBIF.org on 2020-09-18. accessed via GBIF.org on 2021-06-17. https://www.gbif.org/occurrence/864486744
49	Centrophorus granulosus	Spain	Balearic Islands	39.2191	N	2.6841	E	Meléndez MJ, Báez JC, Serna-Quintero JM, Camiñas JA, Fernández IdL, Real R, Macías D (2017) Historical and ecological drivers of the spatial pattern of Chondrichthyes species richness in the Mediterranean Sea. PLoS ONE 12 (4): e0175699. https://doi.org/10.1371/journal.pone.0175728
50	Centrophorus uyato	Spain	Balearic Islands	39.2191	N	2.6841	E	Massutí E, Moranta J (2003) Demersal assemblages and depth distribution of elasmobrachs from the continental shelf and slope off the Balearic Islands (western Mediterranean). ICES Journal of Marine Science 60 (4): 753-766.
51	Centrophorus uyato	Spain	Balearic Islands	39.2191	N	2.6841	E	Meléndez MJ, Báez JC, Serna-Quintero JM, Camiñas JA, Fernández IdL, Real R, Macías D (2017) Historical and ecological drivers of the spatial pattern of Chondrichthyes species richness in the Mediterranean Sea. PLoS ONE 12 (4): e0175699. https://doi.org/10.1371/journal.pone.0175729
52	Centrophorus granulosus	Spain	Balearic Islands	40	N	5	E	MNHN, Chagnoux S (2021) The fishes collection (IC) of the Muséum national d'Histoire naturelle (MNHN - Paris). Version 57.214. MNHN - Museum national d'Histoire naturelle. Occurrence dataset https://doi.org/10.15468/tm7whu accessed via GBIF.org on 2021-06-17. https://www.gbif.org/occurrence/583452010
53	Centrophorus uyato	France	Gulf of Lions	42.9373	N	3.6256	E	Bertrand J, Gil de Sola L, Papakonstantinou C, Relini G, Souplet A (2000) Contribution on the distribution of elasmobranchs in the Mediterranean (from the Medits Surveys). Biologia Marina Mediterranea 7 (1): 385-399.
54	Centrophorus uyato	France	Côte d'Azur (near Toulon)	42.9531	N	5.9071	E	Pérès JM (1958) Remarques générales sur un ensemble de quinze plongées effectuées avec le bathyscaphe F.N.R.S. III, Annales de nnstitut Océanographique 35: 259-285, 4 pI.
55	Centrophorus granulosus	France	Northern Ligurian Sea (Le Lavandou)	43.1669	N	6.40147	E	n/a N, Inventaire National du Patrimoine Naturel (2019) Parc_National_de_Port_Cros_2017_12_18. Version 1.1. UMS PatriNat (OFB-CNRS-MNHN), Paris. Occurrence dataset https://doi.org/10.15468/oatraz accessed via GBIF.org on 2021-06-17. https://www.gbif.org/occurrence/2485449696
56	Centrophorus uyato	France, Monaco	Off southern France and Monaco	42.52	N	6.61	E	Meléndez MJ, Báez JC, Serna-Quintero JM, Camiñas JA, Fernández IdL, Real R, Macías D (2017) Historical and ecological drivers of the spatial pattern of Chondrichthyes species richness in the Mediterranean Sea. PLoS ONE 12 (4): e0175699. https://doi.org/10.1371/journal.pone.0175709
57	Centrophorus granulosus	France, Monaco	Off southern France and Monaco	42.52	N	6.61	E	Meléndez MJ, Báez JC, Serna-Quintero JM, Camiñas JA, Fernández IdL, Real R, Macías D (2017) Historical and ecological drivers of the spatial pattern of Chondrichthyes species richness in the Mediterranean Sea. PLoS ONE 12 (4): e0175699. https://doi.org/10.1371/journal.pone.0175708
58	Centrophorus granulosus	France, Monaco	Off southern France and Monaco	42.52	N	6.61	E	Bertrand J, Gil de Sola L, Papakonstantinou C, Relini G, Souplet A (2000) Contribution on the distribution of elasmobranchs in the Mediterranean (from the Medits Surveys). Biologia Marina Mediterranea 7 (1): 385-399.
59	Centrophorus granulosus	France	Northern Ligurian Sea (Nice)	43.7	N	7.25	E	Staatliches Museum für Naturkunde Stuttgart. The Ichthyology Collection at the Staatliches Museum für Naturkunde Stuttgart. Occurrence dataset https://doi.org/10.15468/5pp8jr accessed via GBIF.org on 2021-06-17. https://www.gbif.org/occurrence/2865008254
60	Centrophorus granulosus	France	Northern Ligurian Sea (Nice)	43.7	N	7.266	E	Australian Museum (2021) Australian Museum provider for OZCAM. Occurrence dataset https://doi.org/10.15468/e7susi accessed via GBIF.org on 2021-06-17. https://www.gbif.org/occurrence/1100541691
61	Centrophorus granulosus	France	Northern Ligurian Sea (Nice)	43.7	N	7.267	E	MNHN, Chagnoux S (2021) The fishes collection (IC) of the Muséum national d'Histoire naturelle (MNHN - Paris). Version 57.214. MNHN - Museum national d'Histoire naturelle. Occurrence dataset https://doi.org/10.15468/tm7whu accessed via GBIF.org on 2021-06-17. https://www.gbif.org/occurrence/583451997
62	Centrophorus granulosus	France	Northern Ligurian Sea (Nice)	43.7	N	7.267	E	MNHN, Chagnoux S (2021) The fishes collection (IC) of the Muséum national d'Histoire naturelle (MNHN - Paris). Version 57.214. MNHN - Museum national d'Histoire naturelle. Occurrence dataset https://doi.org/10.15468/tm7whu accessed via GBIF.org on 2021-06-17. https://www.gbif.org/occurrence/583452023
63	Centrophorus granulosus	France	Northern Ligurian Sea (Nice)	43.7	N	7.267	E	MNHN, Chagnoux S (2021) The fishes collection (IC) of the Muséum national d'Histoire naturelle (MNHN - Paris). Version 57.214. MNHN - Museum national d'Histoire naturelle. Occurrence dataset https://doi.org/10.15468/tm7whu accessed via GBIF.org on 2021-06-17. https://www.gbif.org/occurrence/583452027
64	Centrophorus uyato	France	Northern Ligurian Sea (Nice)	43.673	N	7.3	E	Staatliches Museum für Naturkunde Stuttgart. The Ichthyology Collection at the Staatliches Museum für Naturkunde Stuttgart. Occurrence dataset https://doi.org/10.15468/5pp8jr accessed via GBIF.org on 2021-01-23. https://www.gbif.org/occurrence/2865021135
65	Centrophorus uyato	France	Northern Ligurian Sea (Nice)	43.673	N	7.3	E	Harvard University M, Morris PJ (2021) Museum of Comparative Zoology, Harvard University. Version 162.246. Museum of Comparative Zoology, Harvard University. Occurrence dataset https://doi.org/10.15468/p5rupv accessed via GBIF.org on 2021-01-23. https://www.gbif.org/occurrence/863075494
66	Centrophorus granulosus	France	Off Corsica	42.0973	N	9.74216	E	Commonwealth Scientific and Industrial Research Organisation (2020) CSIRO Ichthyology provider for OZCAM. Occurrence dataset https://doi.org/10.15468/azp1pf accessed via GBIF.org on 2021-06-17. https://www.gbif.org/occurrence/1066019630
67	Centrophorus granulosus	France	Off Corsica	42.4397	N	9.71908	E	Riutort Jean-Jacques N, Inventaire National du Patrimoine Naturel (2020) Données naturalistes de Jean-Jacques RIUTORT. Version 1.1. UMS PatriNat (OFB-CNRS-MNHN), Paris. Occurrence dataset https://doi.org/10.15468/97bvs0 accessed via GBIF.org on 2021-06-17. https://www.gbif.org/occurrence/2479797649
68	Centrophorus granulosus	France	Off Corsica	42.503	N	9.67667	E	Riutort Jean-Jacques N, Inventaire National du Patrimoine Naturel (2020) Données naturalistes de Jean-Jacques RIUTORT. Version 1.1. UMS PatriNat (OFB-CNRS-MNHN), Paris. Occurrence dataset https://doi.org/10.15468/97bvs0 accessed via GBIF.org on 2021-06-17. https://www.gbif.org/occurrence/2479793997
69	Centrophorus uyato	France	Off Corsica	42.6387	N	9.653	E	Bertrand J, Gil de Sola L, Papakonstantinou C, Relini G, Souplet A (2000) Contribution on the distribution of elasmobranchs in the Mediterranean (from the Medits Surveys). Biologia Marina Mediterranea 7 (1): 385-399.
70	Centrophorus granulosus	France	Off Corsica	41.904	N	9.62067	E	Riutort Jean-Jacques N, Inventaire National du Patrimoine Naturel (2020) Données naturalistes de Jean-Jacques RIUTORT. Version 1.1. UMS PatriNat (OFB-CNRS-MNHN), Paris. Occurrence dataset https://doi.org/10.15468/97bvs0 accessed via GBIF.org on 2021-06-17. https://www.gbif.org/occurrence/2479795864
71	Centrophorus granulosus	France	Off Corsica	41.5714	N	9.6133	E	Bertrand J, Gil de Sola L, Papakonstantinou C, Relini G, Souplet A (2000) Contribution on the distribution of elasmobranchs in the Mediterranean (from the Medits Surveys). Biologia Marina Mediterranea 7 (1): 385-399.
72	Centrophorus uyato	France	Off Corsica	41.5714	N	9.6133	E	Bertrand J, Gil de Sola L, Papakonstantinou C, Relini G, Souplet A (2000) Contribution on the distribution of elasmobranchs in the Mediterranean (from the Medits Surveys). Biologia Marina Mediterranea 7 (1): 385-399.
73	Centrophorus granulosus	France	Off Corsica	41.872	N	9.60967	E	Riutort Jean-Jacques N, Inventaire National du Patrimoine Naturel (2020) Données naturalistes de Jean-Jacques RIUTORT. Version 1.1. UMS PatriNat (OFB-CNRS-MNHN), Paris. Occurrence dataset https://doi.org/10.15468/97bvs0 accessed via GBIF.org on 2021-06-17. https://www.gbif.org/occurrence/2479768991
74	Centrophorus granulosus	France	Off Corsica	41.6025	N	9.55275	E	Riutort Jean-Jacques N, Inventaire National du Patrimoine Naturel (2020) Données naturalistes de Jean-Jacques RIUTORT. Version 1.1. UMS PatriNat (OFB-CNRS-MNHN), Paris. Occurrence dataset https://doi.org/10.15468/97bvs0 accessed via GBIF.org on 2021-06-17. https://www.gbif.org/occurrence/2479765756
75	Centrophorus granulosus	France	Off Corsica	41.798	N	9.50816	E	Commonwealth Scientific and Industrial Research Organisation (2020) CSIRO Ichthyology provider for OZCAM. Occurrence dataset https://doi.org/10.15468/azp1pf accessed via GBIF.org on 2021-06-17. https://www.gbif.org/occurrence/1066019629
76	Centrophorus granulosus	France	Off Corsica	43.2167	N	9.36667	E	Riutort Jean-Jacques N, Inventaire National du Patrimoine Naturel (2020) Données naturalistes de Jean-Jacques RIUTORT. Version 1.1. UMS PatriNat (OFB-CNRS-MNHN), Paris. Occurrence dataset https://doi.org/10.15468/97bvs0 accessed via GBIF.org on 2021-06-17. https://www.gbif.org/occurrence/2479794692
77	Centrophorus granulosus	France	Off Corsica	43.1358	N	9.36033	E	Riutort Jean-Jacques N, Inventaire National du Patrimoine Naturel (2020) Données naturalistes de Jean-Jacques RIUTORT. Version 1.1. UMS PatriNat (OFB-CNRS-MNHN), Paris. Occurrence dataset https://doi.org/10.15468/97bvs0 accessed via GBIF.org on 2021-06-17. https://www.gbif.org/occurrence/2479797613
78	Centrophorus granulosus	France	Off Corsica	42.7617	N	9.275	E	Riutort Jean-Jacques N, Inventaire National du Patrimoine Naturel (2020) Données naturalistes de Jean-Jacques RIUTORT. Version 1.1. UMS PatriNat (OFB-CNRS-MNHN), Paris. Occurrence dataset https://doi.org/10.15468/97bvs0 accessed via GBIF.org on 2021-06-17. https://www.gbif.org/occurrence/2479767927
79	Centrophorus cf. granulosus	France	Off Corsica	42.6696	N	8.4846	E	Follesa MC, Marongiu MF, Zupa W, Bellodi A, Cau A, Cannas R, Colloca F, Djurovic M, Isajlovic I, Jadaud A, Manfredi C, Mulas A, Peristeraki P, Porcu C, Ramirez-Amaro S, Jiménez FS, Serena F, Sion L, Thasitis I, Cau A, Carbonara P (2019) Spatial variability of Chondrichthyes in the northern Mediterranean. Scientia Marina 83: 81-100.
80	Centrophorus granulosus	Italy	Off Sardenia	39.7917	N	8.05298	E	Relini G, Mannini A, De Ranieri S, Bitetto I, Follesa MC, Gancitano V, Manfredi C, Casciaro L, Sion L (2010) Chondrichthyes caught during the medits surveys in Italian waters. Biologia Marina Mediterranea 17 (1): 186-204.
81	Centrophorus granulosus	Italy	Off Sardenia	38.8657	N	8.4747	E	Bertrand J, Gil de Sola L, Papakonstantinou C, Relini G, Souplet A (2000) Contribution on the distribution of elasmobranchs in the Mediterranean (from the Medits Surveys). Biologia Marina Mediterranea 7 (1): 385-399.
82	Centrophorus granulosus	Italy	Off Sardinia (Teulada)	38.8397	N	8.74168	E	Cariani A, Messinetti S, Ferrari A, Arculeo M, Bonello JJ, Bonnici L, Cannas R, Carbonara P, Cau A, Charilaou C, EL Ouamari N, Fiorentino F, Follesa M.C, Garofalo G, Golani D, Guarniero I, Hanner R, HEMIDA F, Kada O, LO Brutto S, Mancusi C, Morey G, Schembri P.J, Serena F, Sion L, Stagioni M, Tursi A, Vrgoc N, Steinke D, Tinti F (2017) Improving the Conservation of Mediterranean Chondrichthyans: …
83	Centrophorus granulosus	Italy	Off Sardenia	41.047	N	9.7596	E	Bertrand J, Gil de Sola L, Papakonstantinou C, Relini G, Souplet A (2000) Contribution on the distribution of elasmobranchs in the Mediterranean (from the Medits Surveys). Biologia Marina Mediterranea 7 (1): 385-399.
84	Centrophorus cf. granulosus	Italy	Off Sardenia	39.9699	N	9.90882	E	Follesa MC, Marongiu MF, Zupa W, Bellodi A, Cau A, Cannas R, Colloca F, Djurovic M, Isajlovic I, Jadaud A, Manfredi C, Mulas A, Peristeraki P, Porcu C, Ramirez-Amaro S, Jiménez FS, Serena F, Sion L, Thasitis I, Cau A, Carbonara P (2019) Spatial variability of Chondrichthyes in the northern Mediterranean. Scientia Marina 83: 81-100.
85	Centrophorus granulosus	Italy	Off Sardenia	39.9699	N	9.90882	E	Relini G, Biagi F, Serena F, Belluscio A, Spedicato MT, Rinelli P, Follesa MC, Piccinetti C, Ungano N, Sion L, Levi D, G.R.U.N.D. (2000) I selaci pescati con lo strascico nei mari italiani. Biologia Marina Mediterranea 7 (1): 347-384.
86	Centrophorus uyato	Italy	South Ligurian Sea	43.1478	N	10.2591	E	Serena F, Relini G (2006) Use of scientific campaings (trawl surveys) for the knowledge of the sensitive habitats. A review of the MEDITS, GRUND and APHIA data with special attention to the Italian Seas. In: Basusta N, Keskin C, Serena F, Seret B (Eds) The Proceedings of the Workshop on Mediterranean Cartilaginous Fish with Emphasis on Southern and Eastern Mediterranean. Turkish Marine Research F…
87	Centrophorus cf. granulosus	Italy	Ligurian, northern and central Tyrrhenian seas	42.5641	N	10.5424	E	Follesa MC, Marongiu MF, Zupa W, Bellodi A, Cau A, Cannas R, Colloca F, Djurovic M, Isajlovic I, Jadaud A, Manfredi C, Mulas A, Peristeraki P, Porcu C, Ramirez-Amaro S, Jiménez FS, Serena F, Sion L, Thasitis I, Cau A, Carbonara P (2019) Spatial variability of Chondrichthyes in the northern Mediterranean. Scientia Marina 83: 81-100.
88	Centrophorus granulosus	Italy	Ligurian, northern and central Tyrrhenian seas	42.5641	N	10.5424	E	Bertrand J, Gil de Sola L, Papakonstantinou C, Relini G, Souplet A (2000) Contribution on the distribution of elasmobranchs in the Mediterranean (from the Medits Surveys). Biologia Marina Mediterranea 7 (1): 385-399.
89	Centrophorus granulosus	Italy	Ligurian, northern and central Tyrrhenian seas	42.5641	N	10.5424	E	Relini G, Biagi F, Serena F, Belluscio A, Spedicato MT, Rinelli P, Follesa MC, Piccinetti C, Ungano N, Sion L, Levi D, G.R.U.N.D. (2000) I selaci pescati con lo strascico nei mari italiani. Biologia Marina Mediterranea 7 (1): 347-384.
90	Centrophorus granulosus	Italy	Ligurian, northern and central Tyrrhenian seas	42.5641	N	10.5424	E	Relini G, Mannini A, De Ranieri S, Bitetto I, Follesa MC, Gancitano V, Manfredi C, Casciaro L, Sion L (2010) Chondrichthyes caught during the medits surveys in Italian waters. Biologia Marina Mediterranea 17 (1): 186-204.
91	Centrophorus uyato	Italy	Northern Tyrrhenian Sea	41.6879	N	11.8412	E	Serena F, Relini G (2006) Use of scientific campaings (trawl surveys) for the knowledge of the sensitive habitats. A review of the MEDITS, GRUND and APHIA data with special attention to the Italian Seas. In: Basusta N, Keskin C, Serena F, Seret B (Eds) The Proceedings of the Workshop on Mediterranean Cartilaginous Fish with Emphasis on Southern and Eastern Mediterranean. Turkish Marine Research F…
92	Centrophorus granulosus	Italy	South and central Tyrrhenian Sea	40.1957	N	12.6233	E	Meléndez MJ, Báez JC, Serna-Quintero JM, Camiñas JA, Fernández IdL, Real R, Macías D (2017) Historical and ecological drivers of the spatial pattern of Chondrichthyes species richness in the Mediterranean Sea. PLoS ONE 12 (4): e0175699. https://doi.org/10.1371/journal.pone.0175726
93	Centrophorus granulosus	Italy	South and central Tyrrhenian Sea	40.1957	N	12.6233	E	Relini G, Biagi F, Serena F, Belluscio A, Spedicato MT, Rinelli P, Follesa MC, Piccinetti C, Ungano N, Sion L, Levi D, G.R.U.N.D. (2000) I selaci pescati con lo strascico nei mari italiani. Biologia Marina Mediterranea 7 (1): 347-384.
94	Centrophorus granulosus	Italy	South and central Tyrrhenian Sea	40.1957	N	12.6233	E	Relini G, Mannini A, De Ranieri S, Bitetto I, Follesa MC, Gancitano V, Manfredi C, Casciaro L, Sion L (2010) Chondrichthyes caught during the medits surveys in Italian waters. Biologia Marina Mediterranea 17 (1): 186-204.
95	Centrophorus uyato	Italy	South and central Tyrrhenian Sea	40.1957	N	12.6233	E	Meléndez MJ, Báez JC, Serna-Quintero JM, Camiñas JA, Fernández IdL, Real R, Macías D (2017) Historical and ecological drivers of the spatial pattern of Chondrichthyes species richness in the Mediterranean Sea. PLoS ONE 12 (4): e0175699. https://doi.org/10.1371/journal.pone.0175727
96	Centrophorus uyato	Italy	South and central Tyrrhenian Sea	40.1957	N	12.6233	E	Bertrand J, Gil de Sola L, Papakonstantinou C, Relini G, Souplet A (2000) Contribution on the distribution of elasmobranchs in the Mediterranean (from the Medits Surveys). Biologia Marina Mediterranea 7 (1): 385-399.
97	Centrophorus uyato	Italy	South and central Tyrrhenian Sea	40.1957	N	12.6233	E	Relini G, Mannini A, De Ranieri S, Bitetto I, Follesa MC, Gancitano V, Manfredi C, Casciaro L, Sion L (2010) Chondrichthyes caught during the medits surveys in Italian waters. Biologia Marina Mediterranea 17 (1): 186-204.
98	Centrophorus granulosus	Italy	South and central Tyrrhenian Sea	38.1167	N	13.35	E	Staatliches Museum für Naturkunde Stuttgart. The Ichthyology Collection at the Staatliches Museum für Naturkunde Stuttgart. Occurrence dataset https://doi.org/10.15468/5pp8jr accessed via GBIF.org on 2021-06-17. https://www.gbif.org/occurrence/2865011220
99	Centrophorus granulosus	Italy	South and central Tyrrhenian Sea	38.1167	N	13.35	E	Staatliches Museum für Naturkunde Stuttgart. The Ichthyology Collection at the Staatliches Museum für Naturkunde Stuttgart. Occurrence dataset https://doi.org/10.15468/5pp8jr accessed via GBIF.org on 2021-06-17. https://www.gbif.org/occurrence/2865004699
100	Centrophorus granulosus	Italy	South and central Tyrrhenian Sea	40.8333	N	14.2333	E	Staatliches Museum für Naturkunde Stuttgart. The Ichthyology Collection at the Staatliches Museum für Naturkunde Stuttgart. Occurrence dataset https://doi.org/10.15468/5pp8jr accessed via GBIF.org on 2021-06-17. https://www.gbif.org/occurrence/2865020954
101	Centrophorus granulosus	Italy	South and central Tyrrhenian Sea	40.667	N	14.25	E	MNHN, Chagnoux S (2021) The fishes collection (IC) of the Muséum national d'Histoire naturelle (MNHN - Paris). Version 57.214. MNHN - Museum national d'Histoire naturelle. Occurrence dataset https://doi.org/10.15468/tm7whu accessed via GBIF.org on 2021-06-17. https://www.gbif.org/occurrence/583451999
102	Centrophorus cf. granulosus	Italy	South Tyrrhenian Sea (Cetraro)	39.514	N	15.9286	E	Leonetti FL, Giglio G, Leone A, Coppola F, Romano C, Bottaro M, Reinero F, Milazzo C, Micarelli P, Tripepi S, Sperone E (2020) An updated checklist of chondrichthyans of Calabria (Central Mediterranean, southern Italy), with emphasis on rare species. Mediterranean Marine Science, 21(3), 794-807. http://dx.doi.org/10.12681/mms.23321
103	Centrophorus cf. granulosus	Italy	South Tyrrhenian Sea (Paola)	39.3601	N	16.0127	E	Leonetti FL, Giglio G, Leone A, Coppola F, Romano C, Bottaro M, Reinero F, Milazzo C, Micarelli P, Tripepi S, Sperone E (2020) An updated checklist of chondrichthyans of Calabria (Central Mediterranean, southern Italy), with emphasis on rare species. Mediterranean Marine Science, 21(3), 794-807. http://dx.doi.org/10.12681/mms.23321
104	Centrophorus granulosus	Italy	Messina	38.1833	N	15.5667	E	Senckenberg. Collection Pisces SMF. Occurrence dataset https://doi.org/10.15468/xaofbe accessed via GBIF.org on 2021-06-17. https://www.gbif.org/occurrence/207776110
105	Centrophorus cf. granulosus	Italy	Strait of Sicily	36.8626	N	13.0573	E	Follesa MC, Marongiu MF, Zupa W, Bellodi A, Cau A, Cannas R, Colloca F, Djurovic M, Isajlovic I, Jadaud A, Manfredi C, Mulas A, Peristeraki P, Porcu C, Ramirez-Amaro S, Jiménez FS, Serena F, Sion L, Thasitis I, Cau A, Carbonara P (2019) Spatial variability of Chondrichthyes in the northern Mediterranean. Scientia Marina 83: 81-100.
106	Centrophorus granulosus	Italy	Strait of Sicily	36.8626	N	13.0573	E	Cariani A, Messinetti S, Ferrari A, Arculeo M, Bonello JJ, Bonnici L, Cannas R, Carbonara P, Cau A, Charilaou C, EL Ouamari N, Fiorentino F, Follesa M.C, Garofalo G, Golani D, Guarniero I, Hanner R, HEMIDA F, Kada O, LO Brutto S, Mancusi C, Morey G, Schembri P.J, Serena F, Sion L, Stagioni M, Tursi A, Vrgoc N, Steinke D, Tinti F (2017) Improving the Conservation of Mediterranean Chondrichthyans: …
107	Centrophorus cf. uyato	Italy	Strait of Sicily	36.8626	N	13.0573	E	Colloca F, Carrozzi V, Simonetti A, Di Lorenzo M (2020) Using Local Ecological Knowledge of Fishers to Reconstruct Abundance Trends of Elasmobranch Populations in the Strait of Sicily, Frontiers in Marine Science 7: 508. https://doi.org/10.3389/fmars.2020.00508
108	Centrophorus granulosus	Italy	Strait of Sicily	36.8626	N	13.0573	E	Ragonese S, Vitale S, Dimech M, Mazzola S (2013) Abundances of demersal sharks and chimaera from 1994-2009 scientific surveys in the central Mediterranean. Plos ONE 8: E74865.
109	Centrophorus granulosus	Italy	Strait of Sicily	36.8626	N	13.0573	E	Lauria V, Gristina M, Attrill MJ, Fiorentino F, Garofalo G (2015) Predictive habitat suitability models to aid conservation of elasmobranch diversity in the central Mediterranean Sea. Scientific Reports 5: 13245.
110	Centrophorus granulosus	Italy	Strait of Sicily	36.8626	N	13.0573	E	Relini G, Biagi F, Serena F, Belluscio A, Spedicato MT, Rinelli P, Follesa MC, Piccinetti C, Ungano N, Sion L, Levi D, G.R.U.N.D. (2000) I selaci pescati con lo strascico nei mari italiani. Biologia Marina Mediterranea 7 (1): 347-384.
111	Centrophorus granulosus	Italy	Strait of Sicily	36.8626	N	13.0573	E	Relini G, Mannini A, De Ranieri S, Bitetto I, Follesa MC, Gancitano V, Manfredi C, Casciaro L, Sion L (2010) Chondrichthyes caught during the medits surveys in Italian waters. Biologia Marina Mediterranea 17 (1): 186-204.
112	Centrophorus uyato	Italy	Strait of Sicily	36.8626	N	13.0573	E	Lauria V, Gristina M, Attrill MJ, Fiorentino F, Garofalo G (2015) Predictive habitat suitability models to aid conservation of elasmobranch diversity in the central Mediterranean Sea. Scientific Reports 5: 13245.
113	Centrophorus uyato	Italy	Strait of Sicily	36.8626	N	13.0573	E	Parenti P (2019) The status of the fishes described from Sicily by Rafinesque. FishTaxa 4 (1): 99-124.
114	Centrophorus uyato	Italy	Strait of Sicily	36.8626	N	13.0573	E	Bertrand J, Gil de Sola L, Papakonstantinou C, Relini G, Souplet A (2000) Contribution on the distribution of elasmobranchs in the Mediterranean (from the Medits Surveys). Biologia Marina Mediterranea 7 (1): 385-399.
115	Centrophorus uyato	Italy	Strait of Sicily	36.8626	N	13.0573	E	Relini G, Mannini A, De Ranieri S, Bitetto I, Follesa MC, Gancitano V, Manfredi C, Casciaro L, Sion L (2010) Chondrichthyes caught during the medits surveys in Italian waters. Biologia Marina Mediterranea 17 (1): 186-204.
116	Centrophorus uyato	Italy	SE Sicily (Portopalo di Capopassero)	36.4522	N	15.1968	E	Scacco U, La Mesa G, Vacchi M (2010) Body morphometrics, swimming diversity and niche in demersal sharks: a comparative case study from the Mediterranean Sea. Scientia Marina 74 (1): 37-51.
117	Centrophorus granulosus	Malta	Maltese waters	35.74	N	14.4	E	Schembri (2006) Conservation management of sharks and rays in the Maltese islands (Central Mediterranean) – a review of statuts and trends. In: N. Başusta, Ç. Keskin, F. Serena & S. Bernard (Eds), International workshop on Cartilaginous fishes in the Mediterranean. Turkish Marine Research Foundation, Istanbul, 177-187 pp.
118	Centrophorus granulosus	Malta	Maltese waters	35.74	N	14.4	E	Meléndez MJ, Báez JC, Serna-Quintero JM, Camiñas JA, Fernández IdL, Real R, Macías D (2017) Historical and ecological drivers of the spatial pattern of Chondrichthyes species richness in the Mediterranean Sea. PLoS ONE 12 (4): e0175699. https://doi.org/10.1371/journal.pone.0175722
119	Centrophorus granulosus	Malta	Maltese waters	35.74	N	14.4	E	Schembri T, Fergusson IK, Schembri PJ (2003 and references therein) Revision of the records of shark and ray species from the Maltese islands (Chordata: Chondrichthyes). The Central Mediterranean Naturalist 4 (1): 71-104.
120	Centrophorus uyato	Malta	Maltese waters	35.74	N	14.4	E	Schembri (2006) Conservation management of sharks and rays in the Maltese islands (Central Mediterranean) – a review of statuts and trends. In: N. Başusta, Ç. Keskin, F. Serena & S. Bernard (Eds), International workshop on Cartilaginous fishes in the Mediterranean. Turkish Marine Research Foundation, Istanbul, 177-187 pp.
121	Centrophorus uyato	Malta	Maltese waters	35.74	N	14.4	E	Schembri T, Fergusson IK, Schembri PJ (2003 and references therein) Revision of the records of shark and ray species from the Maltese islands (Chordata: Chondrichthyes). The Central Mediterranean Naturalist 4 (1): 71-104.
122	Centrophorus uyato	Malta	Maltese waters	35.74	N	14.4	E	Vella A, Vella N, Schembri S (2017) A molecular approach towards taxonomic identification of elasmobranch species from Maltese fisheries landings. Marine Genomics 36: 17-23. http://dx.doi.org/10.1016/j.margen.2017.08.008.
123	Centrophorus uyato	Malta	Maltese waters	35.74	N	14.4	E	Meléndez MJ, Báez JC, Serna-Quintero JM, Camiñas JA, Fernández IdL, Real R, Macías D (2017) Historical and ecological drivers of the spatial pattern of Chondrichthyes species richness in the Mediterranean Sea. PLoS ONE 12 (4): e0175699. https://doi.org/10.1371/journal.pone.0175723
124	Centrophorus granulosus	Italy	Adriatic Sea (north)	44.1262	N	13.5341	E	Relini G, Biagi F, Serena F, Belluscio A, Spedicato MT, Rinelli P, Follesa MC, Piccinetti C, Ungano N, Sion L, Levi D, G.R.U.N.D. (2000) I selaci pescati con lo strascico nei mari italiani. Biologia Marina Mediterranea 7 (1): 347-384.
125	Centrophorus granulosus	Albania, Bosnia and Herzegovina, Croatia	Adriatic Sea	42.71	N	16.05	E	Meléndez MJ, Báez JC, Serna-Quintero JM, Camiñas JA, Fernández IdL, Real R, Macías D (2017) Historical and ecological drivers of the spatial pattern of Chondrichthyes species richness in the Mediterranean Sea. PLoS ONE 12 (4): e0175699. https://doi.org/10.1371/journal.pone.0175701
126	Centrophorus uyato	Albania, Bosnia and Herzegovina, Croatia	Adriatic Sea	42.71	N	16.05	E	Meléndez MJ, Báez JC, Serna-Quintero JM, Camiñas JA, Fernández IdL, Real R, Macías D (2017) Historical and ecological drivers of the spatial pattern of Chondrichthyes species richness in the Mediterranean Sea. PLoS ONE 12 (4): e0175699. https://doi.org/10.1371/journal.pone.0175702
127	Centrophorus granulosus	Croatia	Adriatic Sea	43.2879	N	16.3483	E	Soldo A (2006 and references therein) Status of the sharks in the Adriatic. In: N. Başusta, Ç. Keskin, F. Serena & S. Bernard (Eds), International workshop on Cartilaginous fishes in the Mediterranean. Turkish Marine Research Foundation, Istanbul, 128-134 pp.
128	Centrophorus uyato	Croatia	Adriatic Sea	43.2879	N	16.3483	E	Milišić N (1994) Sva riba Jadranskog mora, Niva, Split, 463 pp.
129	Centrophorus granulosus	Italy	Southern Adriatic Sea	41.3108	N	17.3474	E	Relini G, Mannini A, De Ranieri S, Bitetto I, Follesa MC, Gancitano V, Manfredi C, Casciaro L, Sion L (2010) Chondrichthyes caught during the medits surveys in Italian waters. Biologia Marina Mediterranea 17 (1): 186-204.
130	Centrophorus granulosus	Italy	Southern Adriatic Sea	41.144	N	17.5135	E	Relini G, Biagi F, Serena F, Belluscio A, Spedicato MT, Rinelli P, Follesa MC, Piccinetti C, Ungano N, Sion L, Levi D, G.R.U.N.D. (2000) I selaci pescati con lo strascico nei mari italiani. Biologia Marina Mediterranea 7 (1): 347-384.
131	Centrophorus cf. granulosus	Italy, Albania, Montenegro	Southern Adriatic Sea	41.3771	N	18.1347	E	Follesa MC, Marongiu MF, Zupa W, Bellodi A, Cau A, Cannas R, Colloca F, Djurovic M, Isajlovic I, Jadaud A, Manfredi C, Mulas A, Peristeraki P, Porcu C, Ramirez-Amaro S, Jiménez FS, Serena F, Sion L, Thasitis I, Cau A, Carbonara P (2019) Spatial variability of Chondrichthyes in the northern Mediterranean. Scientia Marina 83: 81-100.
132	Centrophorus granulosus	Albania	Southern Adriatic Sea	41.0556	N	19.2171	E	Bertrand J, Gil de Sola L, Papakonstantinou C, Relini G, Souplet A (2000) Contribution on the distribution of elasmobranchs in the Mediterranean (from the Medits Surveys). Biologia Marina Mediterranea 7 (1): 385-399.
133	Centrophorus granulosus	Italy	Northwestern Ionian Sea	39.91	N	17.613	E	Cariani A, Messinetti S, Ferrari A, Arculeo M, Bonello JJ, Bonnici L, Cannas R, Carbonara P, Cau A, Charilaou C, EL Ouamari N, Fiorentino F, Follesa M.C, Garofalo G, Golani D, Guarniero I, Hanner R, HEMIDA F, Kada O, LO Brutto S, Mancusi C, Morey G, Schembri P.J, Serena F, Sion L, Stagioni M, Tursi A, Vrgoc N, Steinke D, Tinti F (2017) Improving the Conservation of Mediterranean Chondrichthyans: …
134	Centrophorus cf. granulosus	Italy	Northwestern Ionian Sea	40.1401	N	17.7141	E	Follesa MC, Marongiu MF, Zupa W, Bellodi A, Cau A, Cannas R, Colloca F, Djurovic M, Isajlovic I, Jadaud A, Manfredi C, Mulas A, Peristeraki P, Porcu C, Ramirez-Amaro S, Jiménez FS, Serena F, Sion L, Thasitis I, Cau A, Carbonara P (2019) Spatial variability of Chondrichthyes in the northern Mediterranean. Scientia Marina 83: 81-100.
135	Centrophorus granulosus	Italy	Northwestern Ionian Sea	40.1401	N	17.7141	E	Matarrese A, D’Onghia G, Tursi A, Basanisi M (1996) New information on the ichthyofauna of the south-eastern Italian coast (Ionian Sea). Cybium 20: 197-211.
136	Centrophorus uyato	Italy	Northwestern Ionian Sea	40.1401	N	17.7141	E	Relini G, Mannini A, De Ranieri S, Bitetto I, Follesa MC, Gancitano V, Manfredi C, Casciaro L, Sion L (2010) Chondrichthyes caught during the medits surveys in Italian waters. Biologia Marina Mediterranea 17 (1): 186-204.
137	Centrophorus granulosus	Italy	Western Ionian Sea	38.1053	N	16.7197	E	Relini G, Biagi F, Serena F, Belluscio A, Spedicato MT, Rinelli P, Follesa MC, Piccinetti C, Ungano N, Sion L, Levi D, G.R.U.N.D. (2000) I selaci pescati con lo strascico nei mari italiani. Biologia Marina Mediterranea 7 (1): 347-384.
138	Centrophorus granulosus	Greece	Eastern Ionian Sea (Kefalonia Isl.)	39.3956	N	19.8396	E	Papaconstantinou C (2014 and references therein) Fauna Graeciae. An updated checklist of the fishes in the Hellenic Seas. HCMR, Monographs on Marine Sciences 7: 340 pp.
139	Centrophorus cf. granulosus	Greece	Eastern Ionian Sea	38.8383	N	20.1866	E	Follesa MC, Marongiu MF, Zupa W, Bellodi A, Cau A, Cannas R, Colloca F, Djurovic M, Isajlovic I, Jadaud A, Manfredi C, Mulas A, Peristeraki P, Porcu C, Ramirez-Amaro S, Jiménez FS, Serena F, Sion L, Thasitis I, Cau A, Carbonara P (2019) Spatial variability of Chondrichthyes in the northern Mediterranean. Scientia Marina 83: 81-100.
140	Centrophorus granulosus	Greece	Eastern Ionian Sea	38.8383	N	20.1866	E	Papaconstantinou C (2014 and references therein) Fauna Graeciae. An updated checklist of the fishes in the Hellenic Seas. HCMR, Monographs on Marine Sciences 7: 340 pp.
141	Centrophorus granulosus	Greece	Eastern Ionian Sea	38.8383	N	20.1866	E	Bertrand J, Gil de Sola L, Papakonstantinou C, Relini G, Souplet A (2000) Contribution on the distribution of elasmobranchs in the Mediterranean (from the Medits Surveys). Biologia Marina Mediterranea 7 (1): 385-399.
142	Centrophorus granulosus	Greece	Eastern Ionian Sea	38.8383	N	20.1866	E	Meléndez MJ, Báez JC, Serna-Quintero JM, Camiñas JA, Fernández IdL, Real R, Macías D (2017) Historical and ecological drivers of the spatial pattern of Chondrichthyes species richness in the Mediterranean Sea. PLoS ONE 12 (4): e0175699. https://doi.org/10.1371/journal.pone.0175715
143	Centrophorus uyato	Greece	Eastern Ionian Sea	38.8383	N	20.1866	E	Meléndez MJ, Báez JC, Serna-Quintero JM, Camiñas JA, Fernández IdL, Real R, Macías D (2017) Historical and ecological drivers of the spatial pattern of Chondrichthyes species richness in the Mediterranean Sea. PLoS ONE 12 (4): e0175699. https://doi.org/10.1371/journal.pone.0175710
144	Centrophorus uyato	Greece	Eastern Ionian Sea	38.8383	N	20.1866	E	Papaconstantinou C (2014 and references therein) Fauna Graeciae. An updated checklist of the fishes in the Hellenic Seas. HCMR, Monographs on Marine Sciences 7: 340 pp.
145	Centrophorus granulosus	Greece	Eastern Ionian Sea (Messinian Gulf)	36.5607	N	21.9882	E	Sion L, Bozzano A, D’Onghia G, Capezzuto F, Panza M (2004) Chondrichthyes species in deep waters of the Mediterranean Sea. Scientia Marina 68 (3): 153-162. https://doi.org/10.3989/scimar.2004.68s3153
146	Centrophorus uyato	Greece	Eastern Ionian Sea (Messinian Gulf)	36.73	N	22.11	E	Guerrero E, Abelló P, Lombarte A, Villanueva R, Ramón M, Sabatés A, Santos R (2020) Biological Reference Collections ICM-CSIC. Version 1.28. Institute of Marine Sciences (ICM-CSIC). Occurrence dataset https://doi.org/10.15470/qlqqdx accessed via GBIF.org on 2021-01-23. https://www.gbif.org/occurrence/1313787679
147	Centrophorus granulosus	Greece	Saronikos Gulf	37.7343	N	23.6683	E	Papaconstantinou C (2014 and references therein) Fauna Graeciae. An updated checklist of the fishes in the Hellenic Seas. HCMR, Monographs on Marine Sciences 7: 340 pp.
148	Centrophorus cf. granulosus	Greece	Aegean Sea	38.5468	N	25.0151	E	Follesa MC, Marongiu MF, Zupa W, Bellodi A, Cau A, Cannas R, Colloca F, Djurovic M, Isajlovic I, Jadaud A, Manfredi C, Mulas A, Peristeraki P, Porcu C, Ramirez-Amaro S, Jiménez FS, Serena F, Sion L, Thasitis I, Cau A, Carbonara P (2019) Spatial variability of Chondrichthyes in the northern Mediterranean. Scientia Marina 83: 81-100.
149	Centrophorus granulosus	Greece	Aegean Sea	38.5468	N	25.0151	E	Bertrand J, Gil de Sola L, Papakonstantinou C, Relini G, Souplet A (2000) Contribution on the distribution of elasmobranchs in the Mediterranean (from the Medits Surveys). Biologia Marina Mediterranea 7 (1): 385-399.
150	Centrophorus granulosus	Greece	Aegean Sea	38.5468	N	25.0151	E	Meléndez MJ, Báez JC, Serna-Quintero JM, Camiñas JA, Fernández IdL, Real R, Macías D (2017) Historical and ecological drivers of the spatial pattern of Chondrichthyes species richness in the Mediterranean Sea. PLoS ONE 12 (4): e0175699. https://doi.org/10.1371/journal.pone.0175711
151	Centrophorus granulosus	Greece	Aegean Sea	38.5468	N	25.0151	E	Papaconstantinou C (2014 and references therein) Fauna Graeciae. An updated checklist of the fishes in the Hellenic Seas. HCMR, Monographs on Marine Sciences 7: 340 pp.
152	Centrophorus uyato	Greece	Aegean Sea	38.5468	N	25.0151	E	Papaconstantinou C (2014 and references therein) Fauna Graeciae. An updated checklist of the fishes in the Hellenic Seas. HCMR, Monographs on Marine Sciences 7: 340 pp.
153	Centrophorus uyato	Greece	Aegean Sea	38.5468	N	25.0151	E	Meléndez MJ, Báez JC, Serna-Quintero JM, Camiñas JA, Fernández IdL, Real R, Macías D (2017) Historical and ecological drivers of the spatial pattern of Chondrichthyes species richness in the Mediterranean Sea. PLoS ONE 12 (4): e0175699. https://doi.org/10.1371/journal.pone.0175712
154	Centrophorus granulosus	Greece	Central Aegean Sea (Kyklades Isl.)	37.2851	N	25.1206	E	Papaconstantinou C (2014 and references therein) Fauna Graeciae. An updated checklist of the fishes in the Hellenic Seas. HCMR, Monographs on Marine Sciences 7: 340 pp.
155	Centrophorus granulosus	Greece	Off western Crete	35.1433	N	23.6338	E	Papaconstantinou C (2014 and references therein) Fauna Graeciae. An updated checklist of the fishes in the Hellenic Seas. HCMR, Monographs on Marine Sciences 7: 340 pp.
156	Centrophorus granulosus	Greece	Cretan Sea	35.4428	N	25.5277	E	Bertrand J, Gil de Sola L, Papakonstantinou C, Relini G, Souplet A (2000) Contribution on the distribution of elasmobranchs in the Mediterranean (from the Medits Surveys). Biologia Marina Mediterranea 7 (1): 385-399.
157	Centrophorus granulosus	Greece	Cretan Sea	35.4428	N	25.5277	E	Meléndez MJ, Báez JC, Serna-Quintero JM, Camiñas JA, Fernández IdL, Real R, Macías D (2017) Historical and ecological drivers of the spatial pattern of Chondrichthyes species richness in the Mediterranean Sea. PLoS ONE 12 (4): e0175699. https://doi.org/10.1371/journal.pone.0175713
158	Centrophorus granulosus	Greece	Cretan Sea	35.4428	N	25.5277	E	Papaconstantinou C (2014 and references therein) Fauna Graeciae. An updated checklist of the fishes in the Hellenic Seas. HCMR, Monographs on Marine Sciences 7: 340 pp.
159	Centrophorus spp.	Greece	Cretan Sea	35.4428	N	25.5277	E	Priede IG, Bagley PM (2000) In situ studies on deep-sea demersal fishes using autonomous unmanned lander platforms. In: Gibson RN, Barnes M (Eds) Oceanography and Marine Biology: an Annual Review 38: 357-392.
160	Centrophorus uyato	Greece	Cretan Sea	35.4428	N	25.5277	E	Meléndez MJ, Báez JC, Serna-Quintero JM, Camiñas JA, Fernández IdL, Real R, Macías D (2017) Historical and ecological drivers of the spatial pattern of Chondrichthyes species richness in the Mediterranean Sea. PLoS ONE 12 (4): e0175699. https://doi.org/10.1371/journal.pone.0175714
161	Centrophorus granulosus	Greece	Off Ierapetra (southeastern Crete)	34.9624	N	25.7495	E	Papaconstantinou C (2014 and references therein) Fauna Graeciae. An updated checklist of the fishes in the Hellenic Seas. HCMR, Monographs on Marine Sciences 7: 340 pp.
162	Centrophorus granulosus	Greece	Rhodes Island	36.3551	N	28.3005	E	Papaconstantinou C (2014 and references therein) Fauna Graeciae. An updated checklist of the fishes in the Hellenic Seas. HCMR, Monographs on Marine Sciences 7: 340 pp.
163	Centrophorus spp.	Greece	Rhodes Island	36.3551	N	28.3005	E	Priede IG, Bagley PM (2000) In situ studies on deep-sea demersal fishes using autonomous unmanned lander platforms. In: Gibson RN, Barnes M (Eds) Oceanography and Marine Biology: an Annual Review 38: 357-392.
164	Centrophorus granulosus	Turkey	Sea of Marmara	40.4283	N	28.2794	E	Fricke R, Bilecenoglu M, Sari HM (2007) Annotated checklist of fish and lamprey species (Gnathostomata and Petromyzontomorphi) of Turkey, including a Red List of threatened and declining species. Stuttgarter Beiträge zur Naturkunde, Serie A, 706: 1-169.
165	Centrophorus granulosus	Turkey	Sea of Marmara	40.4283	N	28.2794	E	Bilecenoğlu M, Kaya M, Cihangir B, Çiçek E (2014) An updated checklist of the marine fishes of Turkey. Turkish Journal of Zoology 38: 901-929.
166	Centrophorus granulosus	Turkey	Sea of Marmara	40.4283	N	28.2794	E	Bilecenoğlu M, Taşkavak E, Mater S, Kaya M (2002 and references therein) Checklist of the marine fishes of Turkey. Zootaxa 113: 1-194.
167	Centrophorus uyato	Turkey	Sea of Marmara	40.4283	N	28.2794	E	Bilecenoğlu M, Taşkavak E, Mater S, Kaya M (2002 and references therein) Checklist of the marine fishes of Turkey. Zootaxa 113: 1-194.
168	Centrophorus uyato	Turkey	Sea of Marmara	40.4283	N	28.2794	E	Bilecenoğlu M, Kaya M, Cihangir B, Çiçek E (2014) An updated checklist of the marine fishes of Turkey. Turkish Journal of Zoology 38: 901-929.
169	Centrophorus uyato	Turkey	Sea of Marmara	40.4283	N	28.2794	E	Fricke R, Bilecenoglu M, Sari HM (2007) Annotated checklist of fish and lamprey species (Gnathostomata and Petromyzontomorphi) of Turkey, including a Red List of threatened and declining species. Stuttgarter Beiträge zur Naturkunde, Serie A, 706: 1-169.
170	Centrophorus granulosus	Turkey	NE Aegean Sea	38.7781	N	26.5336	E	Fricke R, Bilecenoglu M, Sari HM (2007) Annotated checklist of fish and lamprey species (Gnathostomata and Petromyzontomorphi) of Turkey, including a Red List of threatened and declining species. Stuttgarter Beiträge zur Naturkunde, Serie A, 706: 1-169.
171	Centrophorus granulosus	Turkey	NE Aegean Sea	38.7781	N	26.5336	E	Bilecenoğlu M, Kaya M, Cihangir B, Çiçek E (2014) An updated checklist of the marine fishes of Turkey. Turkish Journal of Zoology 38: 901-929.
172	Centrophorus granulosus	Turkey	NE Aegean Sea	38.7781	N	26.5336	E	Bilecenoğlu M, Taşkavak E, Mater S, Kaya M (2002 and references therein) Checklist of the marine fishes of Turkey. Zootaxa 113: 1-194.
173	Centrophorus granulosus	Turkey	off south Tutkey	36	N	31.15	E	Fricke R, Bilecenoglu M, Sari HM (2007) Annotated checklist of fish and lamprey species (Gnathostomata and Petromyzontomorphi) of Turkey, including a Red List of threatened and declining species. Stuttgarter Beiträge zur Naturkunde, Serie A, 706: 1-169.
174	Centrophorus granulosus	Turkey	off south Tutkey	36	N	31.15	E	Meléndez MJ, Báez JC, Serna-Quintero JM, Camiñas JA, Fernández IdL, Real R, Macías D (2017) Historical and ecological drivers of the spatial pattern of Chondrichthyes species richness in the Mediterranean Sea. PLoS ONE 12 (4): e0175699. https://doi.org/10.1371/journal.pone.0175732
175	Centrophorus granulosus	Turkey	off south Tutkey	36	N	31.15	E	Bilecenoğlu M, Kaya M, Cihangir B, Çiçek E (2014) An updated checklist of the marine fishes of Turkey. Turkish Journal of Zoology 38: 901-929.
176	Centrophorus granulosus	Turkey	off south Tutkey	36	N	31.15	E	Bilecenoğlu M, Taşkavak E, Mater S, Kaya M (2002 and references therein) Checklist of the marine fishes of Turkey. Zootaxa 113: 1-194.
177	Centrophorus uyato	Turkey	off south Tutkey	36	N	31.15	E	Meléndez MJ, Báez JC, Serna-Quintero JM, Camiñas JA, Fernández IdL, Real R, Macías D (2017) Historical and ecological drivers of the spatial pattern of Chondrichthyes species richness in the Mediterranean Sea. PLoS ONE 12 (4): e0175699. https://doi.org/10.1371/journal.pone.0175733
178	Centrophorus granulosus	Cyprus	Off Cyprus	34.4761	N	33.4451	E	Hadjichristophorou M (2006) Chondrichthyes in Cyprus. In: Başusta N, Keskin Ç, Serena F, Bernard S (Eds) International workshop on cartilaginous fishes in the Mediterranean. Turkish Marine Research Foundation, Istanbul, 271 pp.
179	Centrophorus granulosus	Cyprus	Off Cyprus	34.4761	N	33.4451	E	Meléndez MJ, Báez JC, Serna-Quintero JM, Camiñas JA, Fernández IdL, Real R, Macías D (2017) Historical and ecological drivers of the spatial pattern of Chondrichthyes species richness in the Mediterranean Sea. PLoS ONE 12 (4): e0175699. https://doi.org/10.1371/journal.pone.0175705
180	Centrophorus granulosus	Cyprus	Off Cyprus	34.4761	N	33.4451	E	Gilat E, and Gelman A (1984) On the sharks and fishes observed using underwater photography during a deep-water cruise in the eastern Mediterranean. Fisheries Research 2: 257-271.
181	Centrophorus uyato	Cyprus	Off Cyprus	34.4761	N	33.4451	E	Meléndez MJ, Báez JC, Serna-Quintero JM, Camiñas JA, Fernández IdL, Real R, Macías D (2017) Historical and ecological drivers of the spatial pattern of Chondrichthyes species richness in the Mediterranean Sea. PLoS ONE 12 (4): e0175699. https://doi.org/10.1371/journal.pone.0175706
182	Centrophorus uyato	Cyprus	off Limassol	34.357	N	33.12	E	Present study
183	Centrophorus cf. uyato	Syria	Syrian waters	35.4698	N	35.7227	E	Saad A, Ali M, Seret B (2006) Shark exploitation and conservation in Syria. In: N. Başusta, Ç. Keskin, F. Serena & S. Bernard (Eds), International workshop on Cartilaginous fishes in the Mediterranean. Turkish Marine Research Foundation, Istanbul, 202-208 pp.
184	Centrophorus granulosus	Syria	Syrian waters	35.4698	N	35.7227	E	Saad A, Ali M, Seret B (2006) Shark exploitation and conservation in Syria. In: N. Başusta, Ç. Keskin, F. Serena & S. Bernard (Eds), International workshop on Cartilaginous fishes in the Mediterranean. Turkish Marine Research Foundation, Istanbul, 202-208 pp.
185	Centrophorus granulosus	Syria	Syrian waters	35.4698	N	35.7227	E	Meléndez MJ, Báez JC, Serna-Quintero JM, Camiñas JA, Fernández IdL, Real R, Macías D (2017) Historical and ecological drivers of the spatial pattern of Chondrichthyes species richness in the Mediterranean Sea. PLoS ONE 12 (4): e0175699. https://doi.org/10.1371/journal.pone.0175730
186	Centrophorus uyato	Syria	Syrian waters	35.4698	N	35.7227	E	Meléndez MJ, Báez JC, Serna-Quintero JM, Camiñas JA, Fernández IdL, Real R, Macías D (2017) Historical and ecological drivers of the spatial pattern of Chondrichthyes species richness in the Mediterranean Sea. PLoS ONE 12 (4): e0175699. https://doi.org/10.1371/journal.pone.0175731
187	Centrophorus granulosus	Lebanon	Off Tripoli	34.5345	N	35.7084	E	Bariche M, Fricke R (2020) The marine ichthyofauna of Lebanon: an annotated checklist, history, biogeography, and conservation status. Zootaxa 4775 (1): 001-151.
188	Centrophorus uyato	Lebanon	Off Tripoli	34.5345	N	35.7084	E	Lteif M, Mouawad R, Khalaf G, Lenfant P, Seret B, Verdoit-Jarraya M (2017) Population biology of the little gulper shark Centrophorus uyato in Lebanese waters. Journal of Fish Biology 91 (5): 1491‑1509. https://doi.org/10.1111/jfb.13484
189	Centrophorus uyato	Lebanon	Off Beirut	33.9304	N	35.3215	E	Lteif M, Mouawad R, Khalaf G, Lenfant P, Seret B, Verdoit-Jarraya M (2017) Population biology of the little gulper shark Centrophorus uyato in Lebanese waters. Journal of Fish Biology 91 (5): 1491‑1509. https://doi.org/10.1111/jfb.13484
190	Centrophorus granulosus	Lebanon	Off Sarafand	33.5979	N	35.2263	E	Bariche M, Fricke R (2020) The marine ichthyofauna of Lebanon: an annotated checklist, history, biogeography, and conservation status. Zootaxa 4775 (1): 001-151.
191	Centrophorus uyato	Lebanon	Off Sidon	33.6686	N	35.2141	E	Lteif M, Mouawad R, Khalaf G, Lenfant P, Seret B, Verdoit-Jarraya M (2017) Population biology of the little gulper shark Centrophorus uyato in Lebanese waters. Journal of Fish Biology 91 (5): 1491‑1509. https://doi.org/10.1111/jfb.13484
192	Centrophorus uyato	Lebanon	Off Tyr	33.3193	N	35.0763	E	Lteif M, Mouawad R, Khalaf G, Lenfant P, Seret B, Verdoit-Jarraya M (2017) Population biology of the little gulper shark Centrophorus uyato in Lebanese waters. Journal of Fish Biology 91 (5): 1491‑1509. https://doi.org/10.1111/jfb.13484
193	Centrophorus granulosus	Lebanon	Off Lebanon	33.85	N	35.05	E	Meléndez MJ, Báez JC, Serna-Quintero JM, Camiñas JA, Fernández IdL, Real R, Macías D (2017) Historical and ecological drivers of the spatial pattern of Chondrichthyes species richness in the Mediterranean Sea. PLoS ONE 12 (4): e0175699. https://doi.org/10.1371/journal.pone.0175718
194	Centrophorus granulosus	Lebanon	Off Lebanon	33.85	N	35.05	E	Colloca F, Lelli S (2012) Report of the FAO EastMed support to the fishing trials carried out off the South Lebanese Coast. EastMed technical documents14. FAO, Rome, 38 pp.
195	Centrophorus uyato	Lebanon	Off Lebanon	33.85	N	35.05	E	Meléndez MJ, Báez JC, Serna-Quintero JM, Camiñas JA, Fernández IdL, Real R, Macías D (2017) Historical and ecological drivers of the spatial pattern of Chondrichthyes species richness in the Mediterranean Sea. PLoS ONE 12 (4): e0175699. https://doi.org/10.1371/journal.pone.0175719
196	Centrophorus granulosus	Israel	off western Haifa	32.8655	N	34.9058	E	Golani D (1986-87) On deep-water sharks caught off the Mediterranean coast of Israel. Israel Journal of Zoology, 34 (1-2): 23-31.
197	Centrophorus granulosus	Israel	Off Israel	32.48	N	34.62	E	Meléndez MJ, Báez JC, Serna-Quintero JM, Camiñas JA, Fernández IdL, Real R, Macías D (2017) Historical and ecological drivers of the spatial pattern of Chondrichthyes species richness in the Mediterranean Sea. PLoS ONE 12 (4): e0175699. https://doi.org/10.1371/journal.pone.0175716
198	Centrophorus granulosus	Israel	Off Israel	32.48	N	34.62	E	Golani D (2005 and references therein) Checklist of the Mediterranean Fishes of Israel. Zootaxa 947: 1-90.
199	Centrophorus granulosus	Israel	Off Israel	32.48	N	34.62	E	Pisanty S (1981) Deep water longline fishing trials off the Israeli Coast. Fisheries and Fishbreeding in Israel 16(3): 17-23. (Hebrew, Eng. Abstr.).
200	Centrophorus uyato	Israel	Off Israel	32.48	N	34.62	E	Meléndez MJ, Báez JC, Serna-Quintero JM, Camiñas JA, Fernández IdL, Real R, Macías D (2017) Historical and ecological drivers of the spatial pattern of Chondrichthyes species richness in the Mediterranean Sea. PLoS ONE 12 (4): e0175699. https://doi.org/10.1371/journal.pone.0175717
201	Centrophorus uyato	Egypt	off Alexandria	31.2758	N	29.8189	E	Azab AM, Khalaf-Allah HMM, Sarhan MMH, El-Tabakh MAM (2019) Morphological aspects of dorsal fin for eight shark species with special reference to the first records in Egyptian Mediterranean waters, Alexandria, Egypt. Egyptian Journal of Aquatic Biology & Fisheries 23 (3): 575-588.
202	Centrophorus granulosus	Egypt	off Egypt	31.4412	N	27.8521	E	Akel EH, Karachle P (2017) The marine ichthyofauna of Egypt. Egyptian Journal of Aquatic Biology and Fisheries 21 (3): 81‑116. https://doi.org/10.21608/ejabf.2017.4130
203	Centrophorus granulosus	Egypt	off Egypt	31.4412	N	27.8521	E	Meléndez MJ, Báez JC, Serna-Quintero JM, Camiñas JA, Fernández IdL, Real R, Macías D (2017) Historical and ecological drivers of the spatial pattern of Chondrichthyes species richness in the Mediterranean Sea. PLoS ONE 12 (4): e0175699. https://doi.org/10.1371/journal.pone.0175707
204	Centrophorus uyato	Egypt	off Egypt	31.4412	N	27.8521	E	Farrag MMS (2016) Deep-sea ichthyofauna from Eastern Mediterranean Sea, Egypt: Update and new records. Egyptian Journal of Aquatic Research 42: 479-489.
205	Centrophorus uyato	Egypt	off Egypt	31.4412	N	27.8521	E	Akel EH, Karachle P (2017) The marine ichthyofauna of Egypt. Egyptian Journal of Aquatic Biology and Fisheries 21 (3): 81‑116. https://doi.org/10.21608/ejabf.2017.4130
206	Centrophorus granulosus	Libya	Off Libya	33.18	N	18.7	E	Meléndez MJ, Báez JC, Serna-Quintero JM, Camiñas JA, Fernández IdL, Real R, Macías D (2017) Historical and ecological drivers of the spatial pattern of Chondrichthyes species richness in the Mediterranean Sea. PLoS ONE 12 (4): e0175699. https://doi.org/10.1371/journal.pone.0175720
207	Centrophorus uyato	Libya	Off Libya	33.18	N	18.7	E	Meléndez MJ, Báez JC, Serna-Quintero JM, Camiñas JA, Fernández IdL, Real R, Macías D (2017) Historical and ecological drivers of the spatial pattern of Chondrichthyes species richness in the Mediterranean Sea. PLoS ONE 12 (4): e0175699. https://doi.org/10.1371/journal.pone.0175721
208	Centrophorus granulosus	Tunisia	Gulf of Gabès	34.1165	N	10.4427	E	Bradaï MN, Saisdï B, Enajjar S, Boudain A (2006 and references therein) The Gulf of Gabès: A spot for the Mediterranean elasmobrancs. In: N. Başusta, Ç. Keskin, F. Serena & S. Bernard (Eds), International workshop on Cartilaginous fishes in the Mediterranean. Turkish Marine Research Foundation, Istanbul, 107-117 pp.
209	Centrophorus granulosus	Tunisia	off Tunisia	34.77	N	11.44	E	Quignard JP, Capapé C (1971) Liste commentée des Sélaciens de Tunisie. Bulletin de l'Institut National Scientifique et Technique d'Océanographie et de Pêche de Salammbô 2 (1-2): 132-142.
210	Centrophorus granulosus	Tunisia	off Tunisia	34.77	N	11.44	E	Quignard JP, Capapé C (1971) Liste commentée des Sélaciens de Tunisie. Bulletin de l'Institut National Scientifique et Technique d'Océanographie et de Pêche de Salammbô 2 (1-2): 132-142.
211	Centrophorus granulosus	Tunisia	off Tunisia	34.77	N	11.44	E	Capapé C (1989) Les selaciens des cotes mediterraneennes: aspects generaux de leur ecologie et exemples de peuplements. Oceanis 15 (3): 309-331.
212	Centrophorus granulosus	Tunisia	off Tunisia	34.77	N	11.44	E	Meléndez MJ, Báez JC, Serna-Quintero JM, Camiñas JA, Fernández IdL, Real R, Macías D (2017) Historical and ecological drivers of the spatial pattern of Chondrichthyes species richness in the Mediterranean Sea. PLoS ONE 12 (4): e0175699. https://doi.org/10.1371/journal.pone.0175699
213	Centrophorus uyato	Tunisia	off Tunisia	34.77	N	11.44	E	Meléndez MJ, Báez JC, Serna-Quintero JM, Camiñas JA, Fernández IdL, Real R, Macías D (2017) Historical and ecological drivers of the spatial pattern of Chondrichthyes species richness in the Mediterranean Sea. PLoS ONE 12 (4): e0175699. https://doi.org/10.1371/journal.pone.0175700
214	Centrophorus granulosus	Tunisia	From Tabarka to Bizerte	37.2201	N	9.1315	E	Capapé C (1985) Nouvelle description de Centrophorus granulosus (Schneider, 180 I) (Pisces, Squalidae). Donnees sur la biologie de la reproduction et Ie regime alimentaire des specimens des cotes tunisiennes. Bulletin de l'Institut National Scientifique et Technique d'Océanographie et de Pêche de Salammbô 12: 97-141.
215	Centrophorus granulosus	Algeria	off Algeria	37.1	N	3.14	E	Meléndez MJ, Báez JC, Serna-Quintero JM, Camiñas JA, Fernández IdL, Real R, Macías D (2017) Historical and ecological drivers of the spatial pattern of Chondrichthyes species richness in the Mediterranean Sea. PLoS ONE 12 (4): e0175699. https://doi.org/10.1371/journal.pone.0175703
216	Centrophorus uyato	Algeria	off Algeria	37.1	N	3.14	E	Meléndez MJ, Báez JC, Serna-Quintero JM, Camiñas JA, Fernández IdL, Real R, Macías D (2017) Historical and ecological drivers of the spatial pattern of Chondrichthyes species richness in the Mediterranean Sea. PLoS ONE 12 (4): e0175699. https://doi.org/10.1371/journal.pone.0175704
217	Centrophorus uyato	Algeria	off Algeria	36.935	N	3.035	E	Appiah-Madson H, Distel D, Benson A (2019) Ocean Genome Legacy Collection. Version 1.2. United States Geological Survey. Occurrence dataset https://doi.org/10.15468/jzgqtc accessed via GBIF.org on 2020-06-16. accessed via GBIF.org on 2021-01-23. https://www.gbif.org/occurrence/2382902759
218	Centrophorus granulosus	Algeria	Algiers Fishery Market	36.783	N	3.066	E	Cariani A, Messinetti S, Ferrari A, Arculeo M, Bonello JJ, Bonnici L, Cannas R, Carbonara P, Cau A, Charilaou C, EL Ouamari N, Fiorentino F, Follesa M.C, Garofalo G, Golani D, Guarniero I, Hanner R, HEMIDA F, Kada O, LO Brutto S, Mancusi C, Morey G, Schembri P.J, Serena F, Sion L, Stagioni M, Tursi A, Vrgoc N, Steinke D, Tinti F (2017) Improving the Conservation of Mediterranean Chondrichthyans: …
219	Centrophorus granulosus	Morroco	Southern Alboran Sea	35.2351	N	-4.3992	W	Meléndez MJ, Báez JC, Serna-Quintero JM, Camiñas JA, Fernández IdL, Real R, Macías D (2017) Historical and ecological drivers of the spatial pattern of Chondrichthyes species richness in the Mediterranean Sea. PLoS ONE 12 (4): e0175699. https://doi.org/10.1371/journal.pone.0175724
220	Centrophorus granulosus	Morroco	Southern Alboran Sea	35.2351	N	-4.3992	W	Moumni A, Mesfioui A, Semmoumy S (2006) General overview of sharks landing and research programme in Morocco. In: N. Başusta, Ç. Keskin, F. Serena & S. Bernard (Eds), International workshop on Cartilaginous fishes in the Mediterranean. Turkish Marine Research Foundation, Istanbul, 188-193 pp.
221	Centrophorus uyato	Morroco	Southern Alboran Sea	35.2351	N	-4.3992	W	Moumni A, Mesfioui A, Semmoumy S (2006) General overview of sharks landing and research programme in Morocco. In: N. Başusta, Ç. Keskin, F. Serena & S. Bernard (Eds), International workshop on Cartilaginous fishes in the Mediterranean. Turkish Marine Research Foundation, Istanbul, 188-193 pp.
222	Centrophorus uyato	Morroco	Southern Alboran Sea	35.2351	N	-4.3992	W	Meléndez MJ, Báez JC, Serna-Quintero JM, Camiñas JA, Fernández IdL, Real R, Macías D (2017) Historical and ecological drivers of the spatial pattern of Chondrichthyes species richness in the Mediterranean Sea. PLoS ONE 12 (4): e0175699. https://doi.org/10.1371/journal.pone.0175725
Notes:
Approximate geographic location is highlighted in grey colour.
According to Meléndez et al. (2017) the distribution of Chondrichthyes species recorded in local checklists was mainly referred to countries and the records were assigned to GSAs and no to a point or local area.
Probably a part of the gbif records by Ranz (2017) are included in Guallart (1998), but it was not possible to verify.
The succesfully barcoded individuals assigned to C. granulosus by Cariani et al. (2017) are included in this Table.
