# Supplementary material for: First genetically confirmed records of the little gulper shark Centrophorusuyato (Squaliformes: Centrophoridae) from Cypriot waters
Source: Biodivers Data J. 2021 Sep 16;9:e71837. doi: 10.3897/BDJ.9.e71837 (PMC8460593; doi:10.3897/BDJ.9.e71837)
Supplement: Supplementary material 2 — List of haplotype groups of species of Centrophorus included in the Neighbour-Joining analysis [file bdj-09-e71837-s002.xlsx]

## Sheet: Supplem. material 2
Suppl. material 2. List of haplotype groups (hap) of species of Centrophorus for each mtDNA gene region, cytochrome oxidase c subunit I (COI) and 16S ribosomal RNA (16S rRNA), included in the Neighbour-Joining analysis. The haplotype groups are based on the revised species designation dataset of Veríssimo et al. (2014). The sequences generated in the present study are indicated in bold.
Gene Region	Haplotype groups of Centrophorus species	Accession Numbers of sequences per haplotype group	Geographic origin of sequences
COI	C. atromarginatus_hap1	EU398647-EU398649, EU398651, KM281910	Indo-Pacific
COI	C. atromarginatus_hap2	EU398650	Indo-Pacific
COI	C. granulosus_hap1	KM281914	Atlantic
COI	C. granulosus_hap2	EU003894	Atlantic
COI	C. granulosus_hap3	KM281919	Atlantic
COI	C. granulosus_hap4	DQ108228, EU003893, KM281902	Atlantic, Indian
COI	C. granulosus_hap5	KM281911	Atlantic
COI	C. granulosus_hap6	KM281901	Pacific
COI	C. granulosus_hap7	KM281900	Pacific
COI	C. harrissoni_hap1	KM281908	Pacific
COI	C. harrissoni_hap2	KM281915	Pacific
COI	C. isodon_hap1	EU398652, EU398654	Indo-Pacific
COI	C. isodon_hap2	KM281906	Atlantic
COI	C. isodon_hap3	EU398653, KM281913	Indo-Pacific
COI	C. moluccensis_hap1	KM281918	Indian
COI	C. moluccensis_hap2	KM281912	Pacific
COI	C. moluccensis_hap3	KM281917	Pacific
COI	C. moluccensis_hap4	DQ108227, DQ108231, DQ108232, DQ108240-DQ108242, EU398655, EU398656, KM281916	Indo-Pacific
COI	C. squamosus_hap1	EU003897	Atlantic
COI	C. squamosus_hap10	DQ108230, EU003896, KM281909	Atlantic, Pacific
COI	C. squamosus_hap2	KM281924	Pacific
COI	C. squamosus_hap3	EU003895, KM281922	Atlantic
COI	C. squamosus_hap4	KM281925	Pacific
COI	C. squamosus_hap5	KM281905	Indo-Pacific
COI	C. squamosus_hap6	GU130701	Pacific
COI	C. squamosus_hap7	KM281930	Atlantic
COI	C. squamosus_hap8	KM281923	Atlantic
COI	C. squamosus_hap9	KM281921	Atlantic
COI	C. uyato_hap1	EU398658, EU398659, EU398661, EU398667, EU398668, KM281907	Atlantic, Pacific
COI	C. uyato_hap2	KM281926	Atlantic
COI	C. uyato_hap3	KM281927	Pacific
COI	C. uyato_hap4	KM281929	Atlantic
COI	C. uyato_present study	MZ456040-MZ456052	Mediterranean (present study)
COI	Deania calcea (outgroup)	KM281931	Atlantic
16S rRNA	C. atromarginatus_hap1	JN596820	Indo-Pacific
16S rRNA	C. granulosus_hap1	KM281891	Atlantic
16S rRNA	C. granulosus_hap2	KM281893	Atlantic
16S rRNA	C. granulosus_hap3	KM281890	Atlantic
16S rRNA	C. granulosus_hap4	KM281892	Atlantic
16S rRNA	C. isodon_hap1	JN596816, KM281894	Atlantic, Indo-Pacific
16S rRNA	C. lusitanicus_hap1	JN596818	Indo-Pacific
16S rRNA	C. moluccensis_hap1	GU130627	Pacific
16S rRNA	C. moluccensis_hap2	JN596821	Indo-Pacific
16S rRNA	C. moluccensis_hap3	KM281889	ΝΑ
16S rRNA	C. squamosus_hap1	GU130628, KM281896	Pacific
16S rRNA	C. squamosus_hap2	JN596819, KM281897	Atlantic, Pacific
16S rRNA	C. uyato_hap1	AY147884, JN596817, KM281885	Atlantic, Pacific
16S rRNA	C. uyato_hap2	KM281886	Atlantic
16S rRNA	C. uyato_hap3	KM281887	Atlantic
16S rRNA	C. uyato_present study	MZ452674-MZ452686	Mediterranean (present study)
16S rRNA	Deania calcea (outgroup)	KM281899.1	Atlantic
