# Supplementary material for: First genetically confirmed records of the little gulper shark Centrophorusuyato (Squaliformes: Centrophoridae) from Cypriot waters
Source: Biodivers Data J. 2021 Sep 16;9:e71837. doi: 10.3897/BDJ.9.e71837 (PMC8460593; doi:10.3897/BDJ.9.e71837)
Supplement: Supplementary material 3 — Mean pairwise genetic p-distances (below the diagonal) and intraspecific distances (in bold) between mtDNA COI and 16S rRNA haplotypes of species of Centrophorus [file bdj-09-e71837-s003.xlsx]

## Sheet: Suppl. material 3
Suppl. material 3. Mean pairwise genetic p-distances (%p, below the diagonial) between seven species of Centrophorus for the mtDNA COI and 16S rRNA gene regions. The intraspecific genetic distances are indicated in bold.
COI	C. atromarginatus	C. granulosus	C. harrissoni	C. isodon	C. moluccensis	C. squamosus	C. uyato
C. atromarginatus	0.004
C. granulosus	0.049	0.003
C. harrissoni	0.047	0.057	0.002
C. isodon	0.051	0.056	0.007	0.006
C. moluccensis	0.046	0.055	0.055	0.052	0.004
C. squamosus	0.042	0.026	0.05	0.05	0.046	0.003
C. uyato	0.015	0.043	0.038	0.042	0.039	0.034	0.002
16S rRNA	C. atromarginatus	C. granulosus	C. isodon	C. lusitanicus	C. moluccensis	C. squamosus	C. uyato
C. atromarginatus	n/c
C. granulosus	0.018	0.004
C. isodon	0.014	0.018	n/c
C. lusitanicus	0.008	0.012	0.006	n/c
C. moluccensis	0.011	0.016	0.021	0.015	0.003
C. squamosus	0.013	0.015	0.011	0.005	0.02	0.002
C. uyato	0.011	0.015	0.015	0.009	0.013	0.014	0.003
n/c, not calculated because a sigle haplotype was included in this species' group
